# Supplementary material
Source: HighWire-hosted journal article supplement (https://ejhp.bmj.com/content/ejhpharm-2021-003186)
Supplement: inline-supplementary-material-1 [file inline-supplementary-material-1.pdf]

Supplemental figure 1. Adjusted odds ratios (aOR) of COVID-19 mortality by previous exposure to chronic treatments (non-significant results).

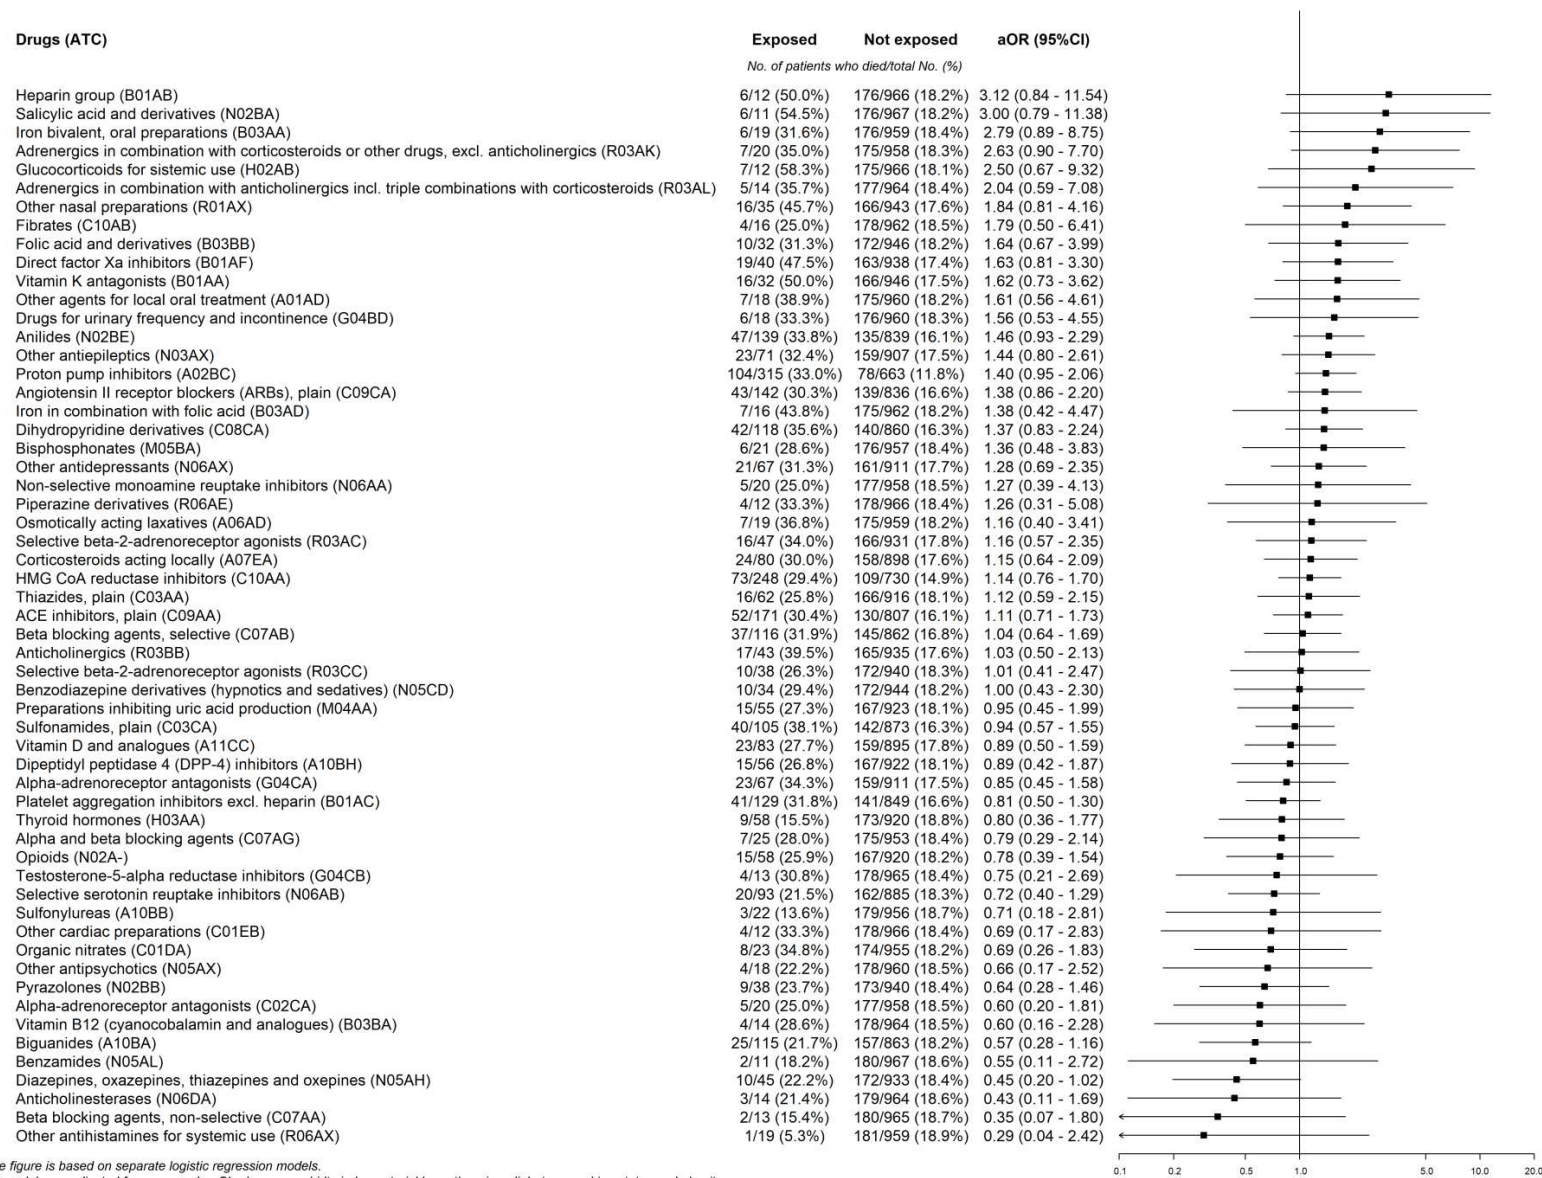

The figure is based on separate logistic regression models.

All models are adjusted for age, gender, Charlson comorbidity index, arterial hypertension, diabetes, smoking status and obesity.
